# Supplementary material for: Development of a UPLC-MS/MS assay for determination of PA-PEG8-PA polymers in rat plasma coupled with [M − H]− to enhance sensitivity
Source: Royal Society of Chemistry journal article supplement (doi:10.1039/d4ay02050b), 2025-01-01
Supplement: d4ay02050b1.pdf [file d4ay02050b1.pdf]

## **Development of UPLC-MS/MS assay for determination of PA-PEG<sub>8</sub>-PA polymers in rat plasma coupled with [M-H]<sup>-</sup> to enhance sensitivity**

Jiye Tian, Chunpeng Feng, Hongyu Xue, Jiansong You, Meiyun Shi<sup>\*\*</sup>, Lei Yin<sup>\*</sup>

<sup>a</sup> Cancer Hospital of Dalian University of Technology, Dalian University of Technology, Shenyang, 110042, China.

<sup>b</sup> School of Chemical Engineering, Ocean and Life Sciences, Dalian University of Technology, Panjin, Liaoning, 124221, China.

<sup>c</sup> Aim Honesty Biopharmaceutical Co. LTD, Dalian, Liaoning. 116600, China.

### **Correspondence**

Lei Yin and Meiyun Shi, School of Life and Pharmaceutical Sciences, Dalian University of Technology, NO.2 Dagong Road, New District of Liaodong Bay, Panjin 124221

E-mails: leiyin@dlut.edu.cn; shimy@dlut.edu.cn

## **Supplementary information**

The supplementary materials included method validation for detection of PA-PEG<sub>8</sub>-PA polymers (Figure S1) and the optimization of mobile phase (aqueous phase) for chromatographic separation of PA-PEG<sub>8</sub>-PA and mPEG<sub>6</sub>-PA (Figure S2).

## Method validation

The procedures for method validation are shown in Fig.S1.

| Items                              | Description                                                                                                                                                                                                                                                                                                             |
|------------------------------------|-------------------------------------------------------------------------------------------------------------------------------------------------------------------------------------------------------------------------------------------------------------------------------------------------------------------------|
| Selectivity                        | The blank matrix samples were individually analyzed for endogenous substances that may interfere with the target analyte.                                                                                                                                                                                               |
| Accuracy and precision             | Accuracy and precision are based on the analysis of six replicate QC samples on three different days.                                                                                                                                                                                                                   |
| Matrix effect                      | Compare the peak areas of PA-PEG8-PA and IS in the precipitated protein spiked sample with those in the pure solution.                                                                                                                                                                                                  |
| Recovery                           | Comparing peak areas of QC samples with those of post-extraction blank rat plasma spiked at corresponding concentrations.                                                                                                                                                                                               |
| Stability                          | Including room temperature storage stability (4 h at room temperature), autosampler stability (4 h at 4 °C), repeated freeze/thaw stability (3 cycles) and long-term stability (-30 °C for 14 d).                                                                                                                       |
| Low limit of quantification (LLOQ) | The lowest concentration of the calibration curve that could be determined with accuracy $\pm$ 20% and precision $\leq$ 15%.                                                                                                                                                                                            |
| Calibration curve                  | At least six, non-zero calibrator levels covering the expected range, including LLOQ per analytical run                                                                                                                                                                                                                 |
| Dilution methodology               | The effect of dilution in the analysis of plasma samples containing PA-PEG8-PA concentrations above the upper limit of the standard curve was validated by analysis of 6 replicates of rat plasma spiked with PA-PEG8-PA 20 $\mu$ g/mL after dilution with blank rat plasma using a 1:20 dilution factor to 1000 ng/mL. |

Fig.S1 The procedures for method validation

## Chromatographic separation of PA-PEG<sub>8</sub>-PA and mPEG<sub>6</sub>-PA polymers

Formic acid should not be added in the aqueous phase, as its presence can reduce the MS intensity of PA-PEG<sub>8</sub>-PA and mPEG<sub>6</sub>-PA. These contents are shown in Figure S2.

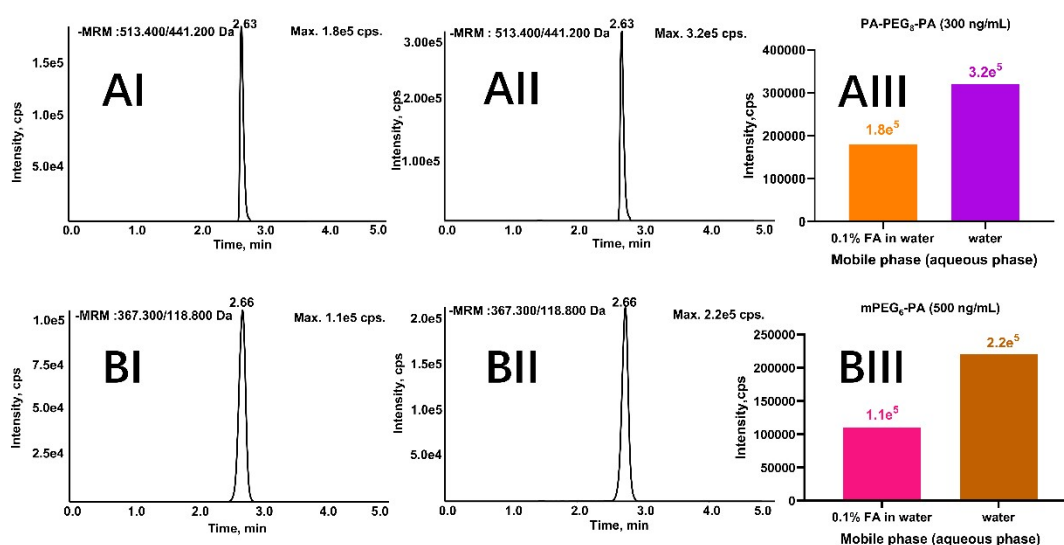

Figure S2. Optimization of UPLC conditions (aqueous phase) for chromatographic separation of PA-PEG<sub>8</sub>-PA (A) and mPEG<sub>6</sub>-PA (B). (AI) The aqueous phase(I), 0.1% formic acid in water; The organic phase (II), methanol; 0.0→1.5 min, II runs from 10%→10%; 1.5-2.0 min, II runs from 10%→95%; 2-3.5 min, II runs from 95%→95%; 3.5-3.6 min, II runs from 95%→10%; 3.6-5.0 min, II runs from 10%→10%. (AII) The aqueous phase(I), water; The organic phase (II), methanol; 0.0→1.5 min, II runs from 10%→10%; 1.5-2.0 min, II runs from 10%→95%; 2-3.5 min, II runs from 95%→95%; 3.5-3.6 min, II runs from 95%→10%; 3.6-5.0 min, II runs from 10%→10%. (AIII) Comparison of MS intensity of PA-PEG<sub>8</sub>-PA with different aqueous phase (0.1% formic acid in water and water); (BI) The aqueous

phase(I), 0.1% formic acid in water; The organic phase (II), methanol; 0.0→1.5 min, II runs from 10%→10%; 1.5-2.0 min, II runs from 10%→95%; 2-3.5 min, II runs from 95%→95%; 3.5-3.6 min, II runs from 95%→10%; 3.6-5.0 min, II runs from 10%→10%. (BII) The aqueous phase(I), water; The organic phase (II), methanol; 0.0→1.5 min, II runs from 10%→10%; 1.5-2.0 min, II runs from 10%→95%; 2-3.5 min, II runs from 95%→95%; 3.5-3.6 min, II runs from 95%→10%; 3.6-5.0 min, II runs from 10%→10%. (BIII) Comparison of MS intensity of mPEG<sub>6</sub>-PA with different aqueous phase (0.1% formic acid in water and water);
